# Supplementary material
Source: Research Square preprint supplement (doi:10.21203/rs.3.rs-9530286/v1)
Supplement: Supplementary file 1 [file 0bb6e8995c8c5a8e3d6d29a9.docx]

**Supplementary Table S1 GenBank accession numbers for *E. nana* sequences used in this study**

| Subtype Classification | Host 1 | Host 2 | Host 3 | Host 4 | GC Contents | Sequence Length (bp) | DDBJ accession number |
| --- | --- | --- | --- | --- | --- | --- | --- |
| *Endolimax nana* ST1-1 | H10.1_2016 |  |  |  | 47.0 % | 1271 bp | LC882021 |
| *Endolimax nana* ST1-1 | H5077.1_2016 |  |  |  | 47.4 % | 1265 bp | LC882022 |
| *Endolimax nana* ST1-1 | H3020.2_2016 |  |  |  | 47.1 % | 1273 bp | LC882023 |
| *Endolimax nana* ST1-1 | H5076.1_2016 |  |  |  | 47.3 % | 1273 bp | LC882024 |
| *Endolimax nana* ST1-1 | H5077.2_2016 |  |  |  | 47.4 % | 1267 bp | LC882025 |
| *Endolimax nana* ST1-1 | H5053_2016 |  |  |  | 47.0 % | 1267 bp | LC882026 |
| *Endolimax nana* ST1-1 |  | P1.8_2015** |  |  | 47.01 % | 1272 bp | LC882027 |
| *Endolimax nana* ST1-1 | H4311.1_2016 |  |  |  | 47.2 % | 1266 bp | LC882028 |
| *Endolimax nana* ST1-1 | H4311.2_2016 |  |  |  | 47.1 % | 1271 bp | LC882029 |
| *Endolimax nana* ST1-1 | H3100.4_2016 |  |  |  | 47.1 % | 1266 bp | LC882030 |
| *Endolimax nana* ST1-1 | H1273.1_2016 |  |  |  | 47.2 % | 1269 bp | LC882031 |
| *Endolimax nana* ST1-1 | HA001.1_2016 |  |  |  | 47.0 % | 1268 bp | LC882032 |
| *Endolimax nana* ST1-1 | H5077.4_2016 |  |  |  | 47.0 % | 1266 bp | LC882033 |
| *Endolimax nana* ST1-1 | H3100.1_2016 |  |  |  | 47.0 % | 1271 bp | LC882034 |
| *Endolimax nana* ST1-1 | H3100.2_2016 |  |  |  | 46.9 % | 1272 bp | LC882035 |
| *Endolimax nana* ST1-1 | H5019_2016 |  |  |  | 47.0 % | 1267 bp | LC882036 |
| *Endolimax nana* ST1-1 | H4053.1_2016 |  |  |  | 46.9 % | 1270 bp | LC882037 |
| *Endolimax nana* ST1-1 | H1288.1_2016 |  |  |  | 47.0 % | 1267 bp | LC882038 |
| *Endolimax nana* ST1-1 | H5076.2_2016 |  |  |  | 47.5 % | 1267 bp | LC882039 |
| *Endolimax nana* ST1-1 | H3170_2016 |  |  |  | 47.0 % | 1273 bp | LC882040 |
| *Endolimax nana* ST1-1 | H4053.2_2016 |  |  |  | 47.2 % | 1272 bp | LC882041 |
| *Endolimax nana* ST1-1 | H3100.3_2016 |  |  |  | 46.7 % | 1269 bp | LC882042 |
| *Endolimax nana* ST1-1 | H4053.3_2016 |  |  |  | 46.9 % | 1273 bp | LC882043 |
| *Endolimax nana* ST1-1 | *Endolimax nana* SW02 OK483221 (sewage) |  |  |  | 47.1% | 1,571 bp | OK483221 |
| *Endolimax nana* ST1-1 | HA001.2_2016 |  |  |  | 47.0 % | 1273 bp | LC882044 |
| *Endolimax nana* ST1-1 | HA008.1_2016 |  |  |  | 46.9 % | 1273 bp | LC882045 |
| *Endolimax nana* ST1-1 | H4053.4_2016 |  |  |  | 47.1 % | 1267 bp | LC882046 |
| *Endolimax nana* ST1-1 | H1273.2_2016 | : |  |  | 47.7 % | 1268 bp | LC882047 |
| *Endolimax nana* ST1-1 | H4311.3_2016 |  |  |  | 47.0 % | 1267 bp | LC882048 |
| *Endolimax nana* ST1-1 | H70_2016 |  |  |  | 47.2 % | 1267 bp | LC882049 |
| *Endolimax nana* ST1-1 | H5077.3_2016 |  |  |  | 47.2 % | 1267 bp | LC882050 |
| *Endolimax nana* ST1-1 | H3020.1_2016 |  |  |  | 47.1 % | 1268 bp | LC882051 |
| *Endolimax nana* ST1-1 | *Endolimax nana* NIH:0591:1 AF149916 (Non human primate) |  |  |  | 47.4% | 2,589 bp | AF149916 |
| *Endolimax nana* ST1-2 |  | D3_2016** |  |  | 47.6% | 1279 bp | LC882052 |
| *Endolimax nana* ST1-2 | H5041.2_2016 |  |  |  | 47.5% | 1280 bp | LC882062 |
| *Endolimax nana* ST1-2 | H5084_2016 |  |  |  | 47.0% | 1280 bp | LC882073 |
| *Endolimax nana* ST1-2 | H4007.1_2016 |  |  |  | 47.0% | 1280 bp | LC882055 |
| *Endolimax nana* ST1-2 | H5083_2016 |  |  |  | 47.0% | 1280 bp | LC882072 |
| *Endolimax nana* ST1-2 | HA008.2_2016 |  |  |  | 46.6% | 1281 bp | LC882075 |
| *Endolimax nana* ST1-2 | H5037_2016 |  |  |  | 46.9% | 1282 bp | LC882058 |
| *Endolimax nana* ST1-2 | *Endolimax* sp. TDP-2 LC230011 (Pig) |  |  |  | 46.4% | 2,582 bp | LC230011 |
| *Endolimax nana* ST1-2 | *Endolimax* sp. TDP-2 LC230013 (Pig) |  |  |  | 46.2% | 2,584 bp | LC230013 |
| *Endolimax nana* ST1-2 | HA008.3_2016 |  |  |  | 47.0% | 1280 bp | LC882076 |
| *Endolimax nana* ST1-2 | H5058.4_2016 |  |  |  | 46.9 % | 1281 bp | LC882071 |
| *Endolimax nana* ST1-2 | H10.2_2016 |  |  |  | 46.9 % | 1281 bp | LC882053 |
| *Endolimax nana* ST1-2 | H5041.3_2016 |  |  |  | 46.9 % | 1282 bp | LC882063 |
| *Endolimax nana* ST1-2 | H5042.2_2016 |  |  |  | 47.0 % | 1281 bp | LC882066 |
| *Endolimax nana* ST1-2 | H5038.2_2016 |  |  |  | 47.0 % | 1282 bp | LC882060 |
| *Endolimax nana* ST1-2 | *Endolimax* sp. TDP-2 LC230015 (Pig) |  |  |  | 46.2% | 2,580 bp | LC230015 |
| *Endolimax nana* ST1-2 | H5058.1_2016 |  |  |  | 47.1 % | 1281 bp | LC882068 |
| *Endolimax nana* ST1-2 | H10.3_2016 |  |  |  | 47.0 % | 1280 bp | LC882054 |
| *Endolimax nana* ST1-2 | H5043.1_2016 |  |  |  | 47.0 % | 1280 bp | LC882067 |
| *Endolimax nana* ST1-2 | H5038.1_2016 |  |  |  | 47.0 % | 1283 bp | LC882059 |
| *Endolimax nana* ST1-2 | H5058.2_2016 |  |  |  | 47.1 % | 1281 bp | LC882069 |
| *Endolimax nana* ST1-2 | H5012.2_2016 |  |  |  | 47.0 % | 1280 bp | LC882057 |
| *Endolimax nana* ST1-2 | H5089_2016 |  |  |  | 47.0 % | 1281 bp | LC882074 |
| *Endolimax nana* ST1-2 | *Endolimax* sp. TDP-2 LC230014 (Pig) |  |  |  | 46.3% | 2,580 bp | LC230014 |
| *Endolimax nana* ST1-2 | H5012.1_2016 |  |  |  | 46.9 % | 1280 bp | LC882056 |
| *Endolimax nana* ST1-2 | H5042.1_2016 |  |  |  | 46.8 % | 1280 bp | LC882065 |
| *Endolimax nana* ST1-2 | *Endolimax* sp. TDP-2 LC230012 (Pig) |  |  |  | 46.3% | 2,580 bp | LC230012 |
| *Endolimax nana* ST1-2 | H5041.4_2016 |  |  |  | 46.7 % | 1282 bp | LC882064 |
| *Endolimax nana* ST1-2 | H5058.3_2016 |  |  |  | 47.0 % | 1282 bp | LC882070 |
| *Endolimax nana* ST1-2 | H5041.1_2016 |  |  |  | 47.0 % | 1280 bp | LC882061 |
| *Endolimax nana* ST1-2 | *Endolimax nana* SW03 OK483222 (Sewage) |  |  |  | 46.5% | 1,593 bp | OK483222 |
| *Endolimax nana* ST2-1 | H3104_2016 |  |  |  | 46.8% | 1255 bp | LC882109 |
| *Endolimax nana* ST2-1 | H3101_2016 |  |  |  | 46.5% | 1257 bp | LC882108 |
| *Endolimax nana* ST2-1 | H5044_2016 |  |  |  | 46.8% | 1255 bp | LC882121 |
| *Endolimax nana* ST2-1 | H920_2016 |  |  |  | 46.8% | 1255 bp | LC882097 |
| *Endolimax nana* ST2-1 | H922_2016 |  |  |  | 46.9% | 1256 bp | LC882098 |
| *Endolimax nana* ST2-1 | H3092_2016 |  |  |  | 46.9% | 1255 bp | LC882107 |
| *Endolimax nana* ST2-1 | P2_2015 |  |  |  | 47.0% | 1256 bp | LC882083 |
| *Endolimax nana* ST2-1 |  | Du3_2015** |  |  | 47.0% | 1256 bp | LC882079 |
| *Endolimax nana* ST2-1 | H169_2016 |  |  |  | 46.8% | 1256 bp | LC882096 |
| *Endolimax nana* ST2-1 | H5020_2016 |  |  |  | 46.9% | 1256 bp | LC882119 |
| *Endolimax nana* ST2-1 | H4309_2016 |  |  |  | 46.8% | 1256 bp | LC882118 |
| *Endolimax nana* ST2-1 | P14_2015 |  |  |  | 46.7% | 1256 bp | LC882095 |
| *Endolimax nana* ST2-1 | H4050_2016 |  |  |  | 46.7% | 1256 bp | LC882117 |
| *Endolimax nana* ST2-1 | P4.12_2015 |  |  |  | 47.2% | 1256 bp | LC882088 |
| *Endolimax nana* ST2-1 | P4.9_2015 |  |  |  | 47.1% | 1256 bp | LC882087 |
| *Endolimax nana* ST2-1 | P4.1_2015 |  |  |  | 46.9% | 1256 bp | LC882084 |
| *Endolimax nana* ST2-1 | H1288.3_2016 |  |  |  | 46.9% | 1256 bp | LC882104 |
| *Endolimax nana* ST2-1 | P4.7_2015 |  |  |  | 47.3% | 1256 bp | LC882086 |
| *Endolimax nana* ST2-1 | P5.10_2015 |  |  |  | 46.9% | 1256 bp | LC882092 |
| *Endolimax nana* ST2-1 | H3105.1_2016 |  |  |  | 47.0% | 1256 bp | LC882110 |
| *Endolimax nana* ST2-1 | P1.2_2015 |  |  |  | 47.0% | 1252 bp | LC882080 |
| *Endolimax nana* ST2-1 | P5.9_2015 |  |  |  | 47.4% | 1253 bp | LC882091 |
| *Endolimax nana* ST2-1 | H5060_2016 |  |  |  | 46.8% | 1255 bp | LC882122 |
| *Endolimax nana* ST2-1 | P4.6_2015 |  |  |  | 46.9% | 1255 bp | LC882085 |
| *Endolimax nana* ST2-1 | H1284_2016 |  |  |  | 46.7% | 1257 bp | LC882102 |
| *Endolimax nana* ST2-1 | H1288.2_2016 |  |  |  | 46.5% | 1257 bp | LC882103 |
| *Endolimax nana* ST2-1 | H4012_2016 |  |  |  | 46.7% | 1256 bp | LC882116 |
| *Endolimax nana* ST2-1 | H1294_2016 |  |  |  | 46.9% | 1256 bp | LC882106 |
| *Endolimax nana* ST2-1 | H3117_2016 |  |  |  | 46.8% | 1257 bp | LC882112 |
| *Endolimax nana* ST2-1 | H5070_2016 |  |  |  | 47.0% | 1256 bp | LC882123 |
| *Endolimax nana* ST2-1 | P5.2_2015 |  |  |  | 47.0% | 1256 bp | LC882089 |
| *Endolimax nana* ST2-1 | P1.6_2015 |  |  |  | 47.5% | 1257 bp | LC882081 |
| *Endolimax nana* ST2-1 | P5.13_2015 |  |  |  | 47.4% | 1255 bp | LC882094 |
| *Endolimax nana* ST2-1 | P5.12_2015 |  |  |  | 47.0% | 1255 bp | LC882093 |
| *Endolimax nana* ST2-1 | H3105.2_2016 |  |  |  | 46.9% | 1257 bp | LC882111 |
| *Endolimax nana* ST2-1 | H925.1_2016 |  |  |  | 47.6% | 1256 bp | LC882099 |
| *Endolimax nana* ST2-1 | P1.10_2015 |  |  |  | 47.4% | 1253 bp | LC882082 |
| *Endolimax nana* ST2-1 | H925.3_2016 |  |  |  | 47.4% | 1256 bp | LC882101 |
| *Endolimax nana* ST2-1 | H925.2_2016 |  |  |  | 47.5% | 1255 bp | LC882100 |
| *Endolimax nana* ST2-1 | P5.3_2015 |  |  |  | 47.4% | 1256 bp | LC882090 |
| *Endolimax nana* ST2-1 | H1293_2016 |  |  |  | 47.2% | 1256 bp | LC882105 |
| *Endolimax nana* ST2-1 | R5.2_2016 |  |  |  | 46.8% | 1256 bp | LC882127 |
| *Endolimax nana* ST2-1 | R2.2_2016 |  |  |  | 47.2% | 1255 bp | LC882124 |
| *Endolimax nana* ST2-1 | H4007.2_2016 |  |  |  | 47.3% | 1255 bp | LC882113 |
| *Endolimax nana* ST2-1 | R39_2016 |  |  |  | 47.1% | 1255 bp | LC882131 |
| *Endolimax nana* ST2-1 | R5.1_2016 |  |  |  | 47.0% | 1255 bp | LC882126 |
| *Endolimax nana* ST2-1 | R8.6_2016 |  |  |  | 46.9% | 1255 bp | LC882129 |
| *Endolimax nana* ST2-1 | H4007.4_2016 |  |  |  | 47.2% | 1255 bp | LC882115 |
| *Endolimax nana* ST2-1 | R8.2_2016 |  |  |  | 47.0% | 1254 bp | LC882128 |
| *Endolimax nana* ST2-1 | H4007.3_2016 |  |  |  | 46.9% | 1255 bp | LC882114 |
| *Endolimax nana* ST2-1 | R9_2016 | H5025_2016 | C10_2015** | D7_2015** | 46.9% | 1255 bp* | LC882130* |
| *Endolimax nana* ST2-1 | R3.1_2016 |  |  |  | 46.9% | 1255 bp | LC882125 |
| *Endolimax nana* ST2-2 | H5022_2016 |  |  |  | 46.7% | 1271 bp | LC882135 |
| *Endolimax nana* ST2-2 | *Endolimax nana* SW01 OK483220 (Sewage) |  |  |  | 45.9% | 1,605 bp | OK483220 |
| *Endolimax nana* ST2-2 | H5062.1_2016 |  |  |  | 46.4% | 1271 bp | LC882143 |
| *Endolimax nana* ST2-2 | H5031_2016 |  |  |  | 46.6% | 1271 bp | LC882138 |
| *Endolimax nana* ST2-2 | H5026_2016 |  |  |  | 46.5% | 1271 bp | LC882137 |
| *Endolimax nana* ST2-2 | H42_2016 |  |  |  | 46.5% | 1271 bp | LC882132 |
| *Endolimax nana* ST2-2 | H5021_H5024_H5087_2016 |  |  |  | 46.4% | 1271 bp* | LC882133* |
| *Endolimax nana* ST2-2 | H5047_2016 |  |  |  | 46.5% | 1271 bp | LC882147 |
| *Endolimax nana* ST2-2 | H912_2016 |  |  |  | 46.4% | 1272 bp | LC882139 |
| *Endolimax nana* ST2-2 | H1270_H3118_H3216_H4235_H5062.2_2016 |  |  |  | 46.3% | 1271 bp* | LC882140* |
| *Endolimax nana* ST2-2 | H4028_2016 |  |  |  | 46.3% | 1271 bp | LC882141 |

* A representative sequence length and accession number provided for multiple samples that shares the same haplotypes

** May reflect an incidental host as it was presented by only a single sample within subtype.
