# Supplementary material
Source: Research Square preprint supplement (doi:10.21203/rs.3.rs-9530286/v1)
Supplement: Supplementary file 2 [file 58f7515195a19ee1d81bcbec.docx]

**TABLE S3. Binary logistic regression analyses**

**TABLE S3-1. Association of *E. nana* presence and mild/severe diarrhea stool form**

| **Outcome** | **Predictor** | **Adjusted OR** | **95% CI** | **p-value** | **Interpretation** |
| --- | --- | --- | --- | --- | --- |
| Mild diarrheal stool | *E. nana* infection | 0.85 | 0.40-1.82 | 0.668 | Not significant |
| Mild diarrheal stool | Age | 0.71 | 0.58-0.86 | <0.001 | Significant |
| Mild diarrheal stool | Male sex | 0.59 | 0.27-1.26 | 0.179 | Not significant |
| Severe diarrheal stool | *E. nana* infection | 0.84 | 0.42-1.68 | 0.623 | Not significant |
| Severe diarrheal stool | Age | 0.78 | 0.65-0.93 | 0.005 | Significant |
| Severe diarrheal stool | Male sex | 0.50 | 0.25-0.99 | 0.047 | Significant |

Notes:

- Mild and severe diarrheal stool were analyzed using binary logistic regression.
- All models were adjusted for age and sex.

**TABLE S3-2. Association of *E. nana* subtype presence and mild/severe diarrhea stool form**

| **Outcome** | **Predictor** | **Adjusted OR** | **95% CI** | **p-value** | **Interpretation** |
| --- | --- | --- | --- | --- | --- |
| Mild diarrheal stool | ST1-1 | 0.50 | 0.15-1.65 | 0.246 | Not significant |
| Severe diarrheal stool | ST1-1 | 0.51 | 0.15-1.60 | 0.256 | Not significant |
| Bristol stool category (1–7) | ST1-1 | 0.70 | - | 0.429 | Not significant |
| Mild diarrheal stool | ST1-2 | 0.85 | 0.23-3.56 | 0.810 | Not significant |
| Severe diarrheal stool | ST1-2 | 0.60 | 0.17-2.02 | 0.404 | Not significant |
| Bristol stool category (1–7) | ST1-2 | 1.19 | - | 0.729 | Not significant |
| Mild diarrheal stool | ST2-1 | 0.81 | 0.30-2.29 | 0.678 | Not significant |
| Severe diarrheal stool | ST2-1 | 0.84 | 0.32-2.19 | 0.720 | Not significant |
| Bristol stool category (1–7) | ST2-1 | 1.08 | - | 0.848 | Not significant |
| Mild diarrheal stool | ST2-2 | 1.25 | 0.37-5.01 | 0.735 | Not significant |
| Severe diarrheal stool | ST2-2 | 1.81 | 0.58-6.37 | 0.324 | Not significant |
| Bristol stool category (1–7) | ST2-2 | 1.11 | - | 0.839 | Not significant |

Notes:

- Each subtype was analyzed as subtype-present versus all others.
- All models were adjusted for age and sex.

**TABLE S3-3. Association between age/sex and *E. nana* colonization**

| **Outcome** | **Predictor** | **Adjusted OR** | **95% CI** | **p-value** | **Interpretation** |
| --- | --- | --- | --- | --- | --- |
| *E. nana* + | Age | 1.06 | 0.90-1.25 | 0.473 | Not significant |
| *E. nana +* | Male sex | 0.77 | 0.39-1.49 | 0.433 | Not significant |

Notes:

- Outcome = Endolimax nana infection status, positive vs negative.
