# Supplementary material
Source: Research Square preprint supplement (doi:10.21203/rs.3.rs-9530286/v1)
Supplement: Supplementary file 3 [file cae25e1119016c08375b746f.docx]

**Supplementary table S2 Summary of pairwise genetic distances within and between *Endolimax nana* subtypes**

1. Within-subtype (min-max, mean)

| Subtype | Min | Max | Mean |
| --- | --- | --- | --- |
| ST 1-1 | 0.000 | 0.027 | 0.014 |
| ST 1-2 | 0.002 | 0.031 | 0.014 |
| ST 2-1 | 0.001 | 0.031 | 0.012 |
| ST 2-2 | 0.001 | 0.011 | 0.007 |

1. Between major subtypes (ST1 vs ST2; min-max)

| Comparison | Min | Max |
| --- | --- | --- |
| ST1 vs ST2 | 0.101 | 0.189 |

1. Interspecific comparison

| Comparison | Min | Max | Mean |
| --- | --- | --- | --- |
| *E. nana* vs *E. piscium* | 0.525 | 0.563 | 0.540 |

- Distances are substitutions per site calculated from the 1,176 retained positions (Tamura-Nei; pairwise deletion)
- Largest between-subtype divergence: ST1-2 vs ST2-1 (mean 0.172)
